# Supplementary material for: Determinants of COVID-19 Vaccine Acceptance in Six Lower- and Middle-Income Countries
Source: Research Square preprint supplement (doi:10.21203/rs.3.rs-444605/v2), 2021-04-22
Supplement: Supplementary file 2 [file e7a857ec1e3ac70c7553d246.docx]

**Supplementary File #1**

***Note: This is the basic questionnaire used. Some countries chose to omit certain questions.***

Group: ❑ Doer ❑ Non-Doer

**Barrier Analysis Questionnaire:**

**Intended acceptance of COVID-19[[1]](#footnote-1) vaccines among adults living in rural communities in Kenya/ Tanzania/ Myanmar/ Bangladesh/India/DRC**

**Behaviour Statement**

Adult men and women 18 years or older of age living in rural communities have the stated intention to get a COVID-19 vaccine when one is available to them free of charge. [[2]](#footnote-2)

**Demographic Data**

Country**: ____________** Interviewer’s Name: __________________ Questionnaire No.: ____Date: ___/___/___

Community: _____________ Mobile Phone: ____________________

Scripted Introduction:

Hi, my name is_________. I am part of a study team looking into things related to people’s interest and intention for a possible vaccination with a COVID-19 vaccine. At this point, several COVID-19 vaccines are in development and may be approved soon. The study includes a discussion of this issue and will take about 20 minutes. I would like to hear your views on this topic. You are not obliged to participate in the study, and no services will be withheld if you decide not to. Likewise, if you chose to be interviewed, you will not receive any gifts, special services, or remuneration. If there is any particular question that you do not want to answer, you can just ask me to skip the question. Everything we discuss will be held in strict confidence and will not be shared with anyone else.

Would you like to participate in the study? *[If not, thank them for their time.]*

**Section A - Doer/Non-doer Screening Questions**

1. What is your age?

❑ a. 18 years or older (specify age in years here: ____)

❑ b. Less than 18 years 🡪 *Thanks the respondent, end the interview and look for another respondent*

❑ c. Don’t Know / Won’t say 🡪 *Thank the respondent, end the interview and look for another respondent*

1. Sex of the respondent: a.❑ Male b.❑Female c.❑Other
2. Have you ever heard of the disease COVID-19?

❑ a. Yes

❑ b. No 🡪 *Thank the respondent, end the interview and look for another respondent*

❑ c. Don’t Know / Won’t say 🡪 *Thank the respondent, end interview and look for another respondent*

1. If a COVID-19 vaccine was available to you in the coming month, how likely would you be to get the vaccine, that is to go for vaccination? Would you say you are likely or unlikely to get the vaccine?

- ***(If they say “Likely:”)*** *probe further and ask:* Would you say you are Very Likely or Somewhat Likely to get the vaccine?
- ***(If they say “Unlikely:”)*** *probe further and ask:* Would you say you are Very unlikely or Somewhat Unlikely to get the Vaccine?

❑ a. Very Likely / Definitely would get the vaccine

❑ b. Somewhat likely

❑ c. Somewhat unlikely

❑ d. Very unlikely / Definitely would not get the vaccine

❑ e. Don’t Know

❑ f. Won’t say *🡪 Thank the person and end the interview*

*[If they say “definitely”, mark Very Likely. If they say, “definitely not,” mark Very Unlikely.]*

***DOER /NON-DOER CLASSIFICATION TABLE***

| **DOER**  (**ALL** of the following) | **Non-Doer**  (**any ONE** of the following) | **Do Not Interview**  (**any ONE** of the following) |
| --- | --- | --- |
| Question 1 = A |  | Question 1 = B or C |
| Question 3 = A |  | Question 3 = B or C |
| Question 4 = A or B | Question 4 = C, D or E | Question 4 = F |

Group: ❑ Doer ❑ Non-doer

Behaviour Explanation

In the following questions, I am going to be asking you about getting a vaccine that helps prevent the COVID-19 disease. When I say this, I am talking about you going to get a COVID-19 vaccine, free of charge, from a medical worker when the government or health officials announce that an approved COVID-19 vaccine is available in your area.

**Section B – Research Questions**

*(Perceived Self-efficacy)*

1. If a vaccine for COVID -19 were available to you in the coming month free of charge, what might make it ***easier*** for you to get that vaccine?

***(Write all responses below. Probe with “What else?”)***

1. If a vaccine for COVID -19 were available to you in the coming month free of charge, what might make it ***difficult*** for you to get that vaccine?

***(Write all responses below. Probe with “What else?”)***

*(Perceived Positive Consequences)*

**3.** If a vaccine for COVID -19 were available to you in the coming month free of charge, what would be the ***advantages*** of getting that vaccine?

***(Write all responses below. Probe with “What else?”)***

*(Perceived Negative Consequences)*

**4.** If a vaccine for COVID -19 were available to you in the coming month free of charge, what would be the ***disadvantages*** of getting that vaccine?

***(Write all responses below. Probe with “What else?”)***

*(Perceived Social Norms )*

**5.** If a vaccine for COVID -19 were available to **people in your community** in the coming month free of charge, **what portion of the people you know do you think would get the vaccine**? Would you say that most people would get it, about half of people would get it, or very few people would get it?

❑ a. Most people would get the vaccine

❑ b. About half of people would get the vaccine

❑ c. Very few people would get the vaccine

❑ d. Don’t Know / Won’t say

*[If they say everyone, choose “most.” If they say “no one,” mark “few people.”]*

**6.** Do you think that **most of your close family and friends would want you to get a COVID-19 vaccine** if it was available to you in the coming month free of charge?  *[India chose to omit this question.]*

❑ a. Yes

❑ b. No

❑ c. Don’t Know / Won’t say

**7.** Do you think that **most of your community leaders and religious leaders would want you to get a COVID-19 vaccine** if it was available to you in the coming month free of charge? *[Note: This question was not assessed in the DRC.]*

❑ a. Yes

❑ b. No

❑ c. Don’t Know / Won’t say

**8.** If a vaccine for COVID -19 were available to you in the coming month free of charge, who are the people that ***would approve*** of your getting the vaccine?

***(Write all responses below. Probe with “Who else?” )***

**9.** If a vaccine for COVID -19 were available to you in the coming month free of charge, who are the people that ***would disapprove*** of your getting the vaccine?

***(Write all responses below. Probe with “Who else?”)***

**10.** If a **doctor or nurse recommended** that you get the COVID-19 vaccine, how likely would you be to get it? Would you say very likely, somewhat likely, or not likely to get it? *[Note: This question was not asked in the Kenya or India studies.]*

❑ a. Very likely

❑ b. Somewhat likely

❑ c. Not likely

❑ d. Don’t Know / Won’t say

*(Perceived Access)*

**11.** If a vaccine for COVID -19 were available in the country in the coming month free of charge, do you think that **it would be available within 30 minutes walk** from your home?

❑ a. Yes

❑ b. No

❑ c. Don’t Know / Won’t say

**12.** If a vaccine for COVID -19 were available in the country in the coming month free of charge, how much time in minutes or hours do you think people would need to wait in queue, on average, to receive the vaccine**?** *[Note: In the DRC, respondents were asked to rate the degree of difficulty in getting to the clinic where vaccines are normally offered instead. This question was not asked in the Kenya BA study.]*

**(*Write all responses below in Hours and mins)***

___ Hours ___ mins

*(Perceived Susceptibility / Perceived Risk)*

**13.** To your knowledge, what proportion of people in the community where you live have had COVID-19 disease**?** Would you say that **very many people, some people, very few people, or no one has had COVID-19 where you live?**

❑ a. Very many people

❑ b. Some people

❑ c. Very few people

❑ d. No one

❑ e. Don’t Know / Won’t say

**14.** How **likely** do you think it is that you or someone who lives in your household will contract COVID-19 over the next three months? Would you say it’s very likely, somewhat likely or not likely at all?

❑ a. Very likely

❑ b. Somewhat likely

❑ c. Not likely at all

❑ d. Don’t Know / Won’t say

**15.** How **concerned** are you about getting COVID-19? Would you say that you are not at all concerned, a little concerned, moderately concerned, or very concerned?

❑ a. Not at all concerned

❑ b. A little concerned

❑ c. Moderately concerned

❑ d. Very concerned

*(Perceived Severity)*

**16.** How **serious** would it be if you or someone who lives in your household contracted COVID-19? Would you say it would be very serious, somewhat serious, or not serious at all?

❑ a. Very serious

❑ b. Somewhat serious

❑ c. Not serious at all

❑ d. Don’t Know / Won’t say

*(Perceived Action Efficacy / Trust [in the vaccines])*

**17.** If you were to get the vaccine for COVID-19, how likely would it be that you would **get COVID-19 Disease** after that? Very likely, somewhat likely, or not likely at all?

❑ a. Very likely

❑ b. Somewhat likely

❑ c. Not likely at all

❑ d. Don’t Know / Won’t say

**18.** How much would you **trust** a new COVID-19 vaccine if it were available to you in the coming month free of charge? Would you say you would not trust it at all, trust it a little, trust it a moderate amount, or trust it a lot?  *[Note: India chose note to ask this question.]*

❑ a. Not trust it at all

❑ b. Trust it a little

❑ c. Trust it a moderate amount

❑ d. Trust it a lot

❑ e. Don’t Know / Won’t say

**19.** Some people are concerned about the safety of vaccines – such as the likelihood for having a serious reaction – and some people are not. How **safe** do you think it would be for you to get a COVID-19 vaccine? Would you say it would not be safe at all, it would be mostly safe, or it would be very safe for you to get the vaccine? *[Note: India chose to omit this question.]*

❑ a. Not safe at all

❑ b. Mostly safe

❑ c. Very safe

❑ d. Don’t Know / Won’t say

*(Perceived Divine Will)*

**20.**Do you think that **God (or Allah or the gods) approve(s) or disapprove(s) of** people getting a COVID-19 vaccine?

❑ a. I believe that God approves

❑ b. I believe that God does not approve

❑ c. I believe that God does not approve or disapprove

❑ d. Don’t Know / Won’t say

**21.**Do you agree or disagree with the following statement? “Whether I get COVID-19 or not is purely **a matter of God’s will or chance**. The actions I take will have little bearing on whether or not I get COVID-19.”

**(If “Agree”):** “Do you agree a little or agree a lot?”

❑ a. Agree a little

❑ b. Agree a lot

**(If “Disagree”):** “Do you disagree a little or disagree a lot?”

❑ c. Disagree a little

❑ d. Disagree a lot

*(Culture)*

**22.** If a vaccine for COVID -19 were available to you in the coming month free of charge, are there any **cultural or religious reasons** that you would **not** get the vaccine?

❑ a. Yes

❑ b. No 🡪 Go to question #24

❑ c. Don’t Know / Won’t say 🡪 Go to question #24

**23.** What are those reasons?

***(Write all responses below. Probe with “Who else?”)***

*(Other possible correlates)*

**24. What level of education did you complete?**

❑ a. Some primary, but did not complete primary

❑ b. Completed primary

❑ c. Some secondary, but did not complete secondary

❑ d. Completed secondary

❑ e. Some college, but did not complete college

❑ f. Completed college

❑ g. Some graduate work or completed graduate degree

❑ h. Other

❑ i. Don’t know / Won’t say

**25.** Remember, if there is any question that you do not want to answer, you can just ask me to skip the question. Would you **trust the information** that government representatives and politicians provide on the safety and effectiveness of COVID-19 vaccines?

- ***(If “Yes”, ask:)*** Would you say you have a **somewhat high level of trust or a very high level of trust** in the information that government workers or politicians provide on COVID-19 vaccines?
- ***(If “No”, ask:)*** Would you say you have a **somewhat low level of trust, or a very low level of trust** in the information that government workers or politicians provide on COVID-19 vaccines?

❑ a. Very low level of trust

❑ b. Somewhat low level of trust

❑ c. Somewhat high level of trust

❑ d. Very high level of trust

❑ e. Don’t know / Won’t say

**26.** Would you **trust the information** that religious leaders provide on the safety and effectiveness of COVID-19 vaccines?

- ***(If “Yes”, ask:)*** Would you say you have a **somewhat high level of trust or a very high level of trust** in the information that religious leaders provide on COVID-19 vaccines?
- ***(If “No”, ask:)*** Would you say you have a **somewhat low level of trust, or a very low level of trust** in that information that religious leaders provide on COVID-19 vaccines?

❑ a. Very low level of trust

❑ b. Somewhat low level of trust

❑ c. Somewhat high level of trust

❑ d. Very high level of trust

❑ e. Don’t know / Won’t say

**27.** Have you seen or heard of anything that would stop you or others from seeking to get the COVID-19 Vaccine (which is expected soon)?

❑ a. Yes

❑ b. No ***🡪 End the interview and thank the respondent.***

❑ c. Don’t Know / Won’t say ***🡪 End the interview and thank the respondent.***

**28. What have you heard that would stop you or others from seeking to get the COVID-19 vaccine?**

*(List all the things below that they have heard. Say “what else?” after each response.)*

*[Note: In DRC, respondents were also asked if they had previously received the Ebola vaccine.]*

***THANK THE RESPONDENT FOR HIS /HER TIME!***

1. It will be important to find out the local name for COVID-19 (if there is one) through discussions with local health workers and use this throughout the questionnaire. [↑](#footnote-ref-1)
2. Always use the vaccine according to the vaccine manufacturer’s guidance. [↑](#footnote-ref-2)
